# Supplementary material for: Loss-of-function mutation in DDX53 associated with hereditary spastic paraplegia-like disorder
Source: Research Square preprint supplement (doi:10.21203/rs.3.rs-3529208/v1), 2023-11-14
Supplement: Supplementary file 1 [file 24e590f2c1508cf87d2e6445.xlsx]

## Sheet: Supplementary Table 6
Supplementary Table 6
Note: nervous system-related genes were marked in yellow
Gene_id	Gene_name	Description	Trans_type	FPKM.KD-1	FPKM.KD-2	FPKM.KD-3	FPKM.Ctrl-1	FPKM.Ctrl-2	FPKM.Ctrl-3	FC	Log2(fc)	pVal	qVal	Regulation
ENSG00000131711	MAP1B	microtubule associated protein 1B [Source:HGNC Symbol;Acc:HGNC:6836]	protein_coding;processed_transcript	0.933363	1.11593	0.950043	3.56176	3.81969	3.405	0.278065	-1.84651	1.2687e-94	5.1305e-92	down
ENSG00000204681	GABBR1	gamma-aminobutyric acid type B receptor subunit 1 [Source:HGNC Symbol;Acc:HGNC:4070]	nonsense_mediated_decay;retained_intron;protein_coding	1.13767	1.22627	1.40371	4.61403	4.43541	4.00374	0.288638	-1.79267	7.26469e-79	2.45878e-76	down
ENSG00000189056	RELN	reelin [Source:HGNC Symbol;Acc:HGNC:9957]	protein_coding;processed_transcript;retained_intron	6.97053	6.6497	6.67576	22.6529	22.7523	19.3274	0.313536	-1.6733	5.75544e-231	8.96064e-228	down
ENSG00000182272	B4GALNT4	beta-1,4-N-acetyl-galactosaminyltransferase 4 [Source:HGNC Symbol;Acc:HGNC:26315]	protein_coding;nonsense_mediated_decay;retained_intron	1.21039	1.08997	1.12755	3.45433	3.36873	3.1265	0.344529	-1.5373	2.10677e-31	2.06942e-29	down
ENSG00000130600	H19	H19 imprinted maternally expressed transcript [Source:HGNC Symbol;Acc:HGNC:4713]	lncRNA;retained_intron	24.083	24.8979	23.3013	66.3827	65.0301	61.491	0.374706	-1.41617	6.14779e-219	8.70136e-216	down
ENSG00000154358	OBSCN	obscurin, cytoskeletal calmodulin and titin-interacting RhoGEF [Source:HGNC Symbol;Acc:HGNC:15719]	protein_coding;retained_intron;nonsense_mediated_decay;processed_transcript	0.165219	0.170964	0.137381	0.30896	0.319427	0.284913	0.518519	-0.94753	7.77756e-12	2.27397e-10	down
ENSG00000167971	CASKIN1	CASK interacting protein 1 [Source:HGNC Symbol;Acc:HGNC:20879]	protein_coding;retained_intron;processed_transcript	0.119963	0.332282	0.387559	0.524995	0.590491	0.502963	0.518894	-0.946487	0.0050889	0.0351037	down
ENSG00000198157	HMGN5	high mobility group nucleosome binding domain 5 [Source:HGNC Symbol;Acc:HGNC:8013]	protein_coding;processed_transcript	5.26137	4.57308	5.17082	9.04332	10.4537	9.09643	0.52478	-0.930215	2.83617e-19	1.48925e-17	down
ENSG00000165272	AQP3	aquaporin 3 (Gill blood group) [Source:HGNC Symbol;Acc:HGNC:636]	protein_coding;retained_intron;nonsense_mediated_decay	9.32094	9.22537	10.029	16.6305	16.2429	15.9784	0.584939	-0.773642	7.79799e-33	8.17555e-31	down
ENSG00000196535	MYO18A	myosin XVIIIA [Source:HGNC Symbol;Acc:HGNC:31104]	protein_coding;retained_intron;nonsense_mediated_decay;processed_transcript	3.20185	3.3359	3.36769	5.40642	5.32432	4.76121	0.639393	-0.645224	1.96394e-29	1.75727e-27	down
ENSG00000107331	ABCA2	ATP binding cassette subfamily A member 2 [Source:HGNC Symbol;Acc:HGNC:32]	nonsense_mediated_decay;retained_intron;protein_coding;processed_transcript	0.529189	0.480734	0.593906	0.767026	0.7956	0.744161	0.695266	-0.524364	0.000224559	0.00226656	down
ENSG00000163554	SPTA1	spectrin alpha, erythrocytic 1 [Source:HGNC Symbol;Acc:HGNC:11272]	protein_coding;retained_intron;processed_transcript	12.0199	12.4004	12.4935	17.5853	17.1375	16.1559	0.725526	-0.462901	3.18975e-33	3.38985e-31	down
ENSG00000091592	NLRP1	NLR family pyrin domain containing 1 [Source:HGNC Symbol;Acc:HGNC:14374]	protein_coding;processed_transcript;retained_intron;nonsense_mediated_decay	2.53988	2.56022	2.54872	3.6824	3.50959	3.29145	0.729609	-0.454804	1.78297e-11	5.04252e-10	down
ENSG00000128591	FLNC	filamin C [Source:HGNC Symbol;Acc:HGNC:3756]	protein_coding;retained_intron	17.0961	16.7672	18.2881	24.5092	23.761	22.4223	0.737722	-0.438851	7.65587e-30	7.05291e-28	down
ENSG00000111642	CHD4	chromodomain helicase DNA binding protein 4 [Source:HGNC Symbol;Acc:HGNC:1919]	protein_coding;nonsense_mediated_decay;retained_intron;processed_transcript	34.7892	35.83	34.8478	49.8769	48.9801	44.0168	0.738183	-0.43795	2.53755e-34	2.83206e-32	down
ENSG00000184489	PTP4A3	protein tyrosine phosphatase 4A3 [Source:HGNC Symbol;Acc:HGNC:9636]	protein_coding	19.2292	19.5289	20.0497	25.0176	26.8555	27.3141	0.742641	-0.429263	2.20419e-15	8.79923e-14	down
ENSG00000060237	WNK1	WNK lysine deficient protein kinase 1 [Source:HGNC Symbol;Acc:HGNC:14540]	protein_coding;retained_intron;processed_transcript	7.04232	6.93967	7.18783	9.2893	9.86186	8.2052	0.773854	-0.369867	3.28551e-13	1.09886e-11	down
ENSG00000133026	MYH10	myosin heavy chain 10 [Source:HGNC Symbol;Acc:HGNC:7568]	protein_coding;retained_intron	21.0793	21.634	21.5592	28.8586	27.4475	24.5544	0.794857	-0.331233	2.73075e-14	1.01347e-12	down
ENSG00000172889	EGFL7	EGF like domain multiple 7 [Source:HGNC Symbol;Acc:HGNC:20594]	protein_coding;processed_transcript	12.1229	12.9973	13.7486	17.7052	15.6327	15.1154	0.80219	-0.317985	1.57931e-05	0.000204732	down
ENSG00000169689	CENPX	centromere protein X [Source:HGNC Symbol;Acc:HGNC:11422]	protein_coding;processed_transcript;retained_intron	28.8473	27.1481	28.3466	33.8932	34.7347	36.0335	0.805857	-0.311405	1.17157e-07	2.11726e-06	down
ENSG00000100181	TPTEP1	TPTE pseudogene 1 [Source:HGNC Symbol;Acc:HGNC:43648]	processed_transcript;transcribed_unprocessed_pseudogene	14.5949	15.4751	16.0484	20.2566	18.4801	18.4607	0.8063	-0.310611	2.20067e-13	7.49719e-12	down
ENSG00000188620	HMX3	H6 family homeobox 3 [Source:HGNC Symbol;Acc:HGNC:5019]	protein_coding	4.97236	5.29559	5.38219	6.30747	6.36861	6.65627	0.809531	-0.304841	0.00089553	0.00779129	down
ENSG00000185619	PCGF3	polycomb group ring finger 3 [Source:HGNC Symbol;Acc:HGNC:10066]	protein_coding;retained_intron;nonsense_mediated_decay;processed_transcript	7.02402	6.91193	6.9867	8.10207	8.73181	8.53929	0.824597	-0.278239	2.21581e-07	3.85452e-06	down
ENSG00000153922	CHD1	chromodomain helicase DNA binding protein 1 [Source:HGNC Symbol;Acc:HGNC:1915]	retained_intron;nonsense_mediated_decay;protein_coding	13.433	12.84	13.8088	14.8908	17.1928	16.1857	0.830378	-0.26816	1.64291e-08	3.33487e-07	down
ENSG00000061676	NCKAP1	NCK associated protein 1 [Source:HGNC Symbol;Acc:HGNC:7666]	protein_coding;retained_intron;processed_transcript	5.94639	6.06743	6.12806	7.08428	7.70784	7.03245	0.831259	-0.26663	2.55854e-11	7.11955e-10	down
ENSG00000157193	LRP8	LDL receptor related protein 8 [Source:HGNC Symbol;Acc:HGNC:6700]	protein_coding;nonsense_mediated_decay;processed_transcript;retained_intron	3.19848	2.42717	3.32838	3.6044	3.60925	3.51758	0.83439	-0.261206	0.00102056	0.00873749	down
ENSG00000101040	ZMYND8	zinc finger MYND-type containing 8 [Source:HGNC Symbol;Acc:HGNC:9397]	protein_coding;processed_transcript	15.5341	15.8042	15.352	19.4654	18.7971	17.6317	0.835333	-0.259576	2.69511e-10	6.77871e-09	down
ENSG00000198728	LDB1	LIM domain binding 1 [Source:HGNC Symbol;Acc:HGNC:6532]	protein_coding;processed_transcript	34.83	34.5597	36.1613	43.3357	41.0281	41.2547	0.84025	-0.25111	3.38294e-12	1.03475e-10	down
ENSG00000259330	INAFM2	InaF motif containing 2 [Source:HGNC Symbol;Acc:HGNC:35165]	protein_coding;processed_transcript	11.2008	11.3257	13.1116	13.9621	13.7217	14.5255	0.844319	-0.24414	0.000414567	0.00391888	down
ENSG00000117139	KDM5B	lysine demethylase 5B [Source:HGNC Symbol;Acc:HGNC:18039]	protein_coding;retained_intron;nonsense_mediated_decay;processed_transcript	3.75466	3.7029	3.91563	4.54694	4.55925	4.33201	0.846333	-0.240702	1.97278e-09	4.48055e-08	down
ENSG00000164985	PSIP1	PC4 and SFRS1 interacting protein 1 [Source:HGNC Symbol;Acc:HGNC:9527]	processed_transcript;protein_coding	12.2791	12.5472	12.1512	13.5377	15.8713	14.1153	0.849582	-0.235174	1.7109e-05	0.00022005	down
ENSG00000160299	PCNT	pericentrin [Source:HGNC Symbol;Acc:HGNC:16068]	protein_coding;retained_intron;processed_transcript	5.71215	6.34763	5.90509	7.34936	7.16828	6.58534	0.851295	-0.232268	1.89924e-05	0.000242272	down
ENSG00000104723	TUSC3	tumor suppressor candidate 3 [Source:HGNC Symbol;Acc:HGNC:30242]	protein_coding;processed_transcript;nonsense_mediated_decay;retained_intron	11.0514	11.5541	10.3415	13.0379	12.8803	12.6851	0.853478	-0.228575	4.11447e-05	0.000491809	down
ENSG00000130511	SSBP4	single stranded DNA binding protein 4 [Source:HGNC Symbol;Acc:HGNC:15676]	retained_intron;processed_transcript;protein_coding;nonsense_mediated_decay	16.2167	17.0409	17.7179	19.6344	20.423	19.4568	0.856524	-0.223434	2.66394e-05	0.00033074	down
ENSG00000167702	KIFC2	kinesin family member C2 [Source:HGNC Symbol;Acc:HGNC:29530]	processed_transcript;retained_intron;protein_coding	3.99529	4.36305	4.28655	4.79071	5.04663	4.88874	0.858673	-0.219819	0.00728126	0.0471261	down
ENSG00000115694	STK25	serine/threonine kinase 25 [Source:HGNC Symbol;Acc:HGNC:11404]	retained_intron;protein_coding;processed_transcript	6.00306	6.00763	6.07191	7.20222	6.59312	7.19253	0.861574	-0.214953	0.000195314	0.00200583	down
ENSG00000141858	SAMD1	sterile alpha motif domain containing 1 [Source:HGNC Symbol;Acc:HGNC:17958]	protein_coding;processed_transcript	15.878	14.7137	17.3955	18.1011	18.7703	18.6399	0.864457	-0.210134	0.00159227	0.012878	down
ENSG00000147133	TAF1	TATA-box binding protein associated factor 1 [Source:HGNC Symbol;Acc:HGNC:11535]	retained_intron;processed_transcript;protein_coding;nonsense_mediated_decay	6.73944	7.00955	6.85308	7.98568	8.35142	7.36652	0.869153	-0.202319	4.57774e-05	0.000541572	down
ENSG00000087460	GNAS	GNAS complex locus [Source:HGNC Symbol;Acc:HGNC:4392]	protein_coding;retained_intron;processed_transcript	18.5452	19.5331	19.0623	21.7568	21.82	22.0532	0.870647	-0.19984	2.50348e-11	6.97258e-10	down
ENSG00000173064	HECTD4	HECT domain E3 ubiquitin protein ligase 4 [Source:HGNC Symbol;Acc:HGNC:26611]	protein_coding;nonsense_mediated_decay;retained_intron;processed_transcript	2.94782	2.69029	2.85981	3.59068	3.19678	2.95595	0.87217	-0.197318	0.00152494	0.0124177	down
ENSG00000106263	EIF3B	eukaryotic translation initiation factor 3 subunit B [Source:HGNC Symbol;Acc:HGNC:3280]	protein_coding;retained_intron	51.3512	51.4347	52.5693	59.4233	59.0317	57.5024	0.882914	-0.179655	1.17271e-15	4.78582e-14	down
ENSG00000128191	DGCR8	DGCR8 microprocessor complex subunit [Source:HGNC Symbol;Acc:HGNC:2847]	retained_intron;protein_coding	18.2974	17.6895	18.5309	21.4625	19.9131	19.6396	0.893512	-0.162441	2.10034e-05	0.00026564	down
ENSG00000100335	MIEF1	mitochondrial elongation factor 1 [Source:HGNC Symbol;Acc:HGNC:25979]	protein_coding;processed_transcript;nonsense_mediated_decay;retained_intron	12.4968	12.1608	12.4548	13.6845	13.9168	13.7524	0.897438	-0.156117	4.98719e-05	0.000584681	down
ENSG00000142207	URB1	URB1 ribosome biogenesis homolog [Source:HGNC Symbol;Acc:HGNC:17344]	protein_coding;retained_intron;processed_transcript	10.7711	10.6957	10.836	12.3802	12.196	11.3916	0.898106	-0.155042	2.76294e-05	0.000342349	down
ENSG00000075856	SART3	spliceosome associated factor 3, U4/U6 recycling protein [Source:HGNC Symbol;Acc:HGNC:16860]	nonsense_mediated_decay;retained_intron;protein_coding;processed_transcript	10.8825	11.1468	11.1481	12.593	12.3097	12.0137	0.898718	-0.15406	0.000115706	0.00125056	down
ENSG00000099783	HNRNPM	heterogeneous nuclear ribonucleoprotein M [Source:HGNC Symbol;Acc:HGNC:5046]	processed_transcript;retained_intron;protein_coding;nonsense_mediated_decay	76.5513	82.7332	79.5128	88.4052	89.2283	87.9817	0.899035	-0.153551	7.46001e-08	1.3745e-06	down
ENSG00000214753	HNRNPUL2	heterogeneous nuclear ribonucleoprotein U like 2 [Source:HGNC Symbol;Acc:HGNC:25451]	protein_coding;retained_intron	29.0626	29.5472	29.6758	33.1327	32.3476	32.5349	0.900734	-0.150828	1.2748e-06	1.9907e-05	down
ENSG00000134987	WDR36	WD repeat domain 36 [Source:HGNC Symbol;Acc:HGNC:30696]	protein_coding;retained_intron	13.7577	14.9013	14.38	15.6339	16.9096	15.2295	0.900905	-0.150553	0.000691741	0.00620912	down
ENSG00000109685	NSD2	nuclear receptor binding SET domain protein 2 [Source:HGNC Symbol;Acc:HGNC:12766]	protein_coding;processed_transcript;nonsense_mediated_decay;retained_intron	7.51773	7.40639	7.60642	8.89881	8.44932	7.66014	0.900923	-0.150524	0.000327952	0.00317431	down
ENSG00000155506	LARP1	La ribonucleoprotein 1, translational regulator [Source:HGNC Symbol;Acc:HGNC:29531]	protein_coding;retained_intron;nonsense_mediated_decay	45.9721	46.1599	46.66	53.4855	51.6305	48.4743	0.90365	-0.146164	3.47413e-07	5.90167e-06	down
ENSG00000133858	ZFC3H1	zinc finger C3H1-type containing [Source:HGNC Symbol;Acc:HGNC:28328]	protein_coding;nonsense_mediated_decay;retained_intron;processed_transcript	11.848	10.959	11.5682	12.1205	13.2876	12.6313	0.903671	-0.14613	0.000861612	0.00753409	down
ENSG00000104529	EEF1D	eukaryotic translation elongation factor 1 delta [Source:HGNC Symbol;Acc:HGNC:3211]	protein_coding;retained_intron;nonsense_mediated_decay	15.2807	15.1987	15.0794	15.9872	16.7344	17.5546	0.90617	-0.142147	0.000403727	0.00382803	down
ENSG00000092853	CLSPN	claspin [Source:HGNC Symbol;Acc:HGNC:19715]	protein_coding;processed_transcript;retained_intron	8.91342	9.20976	8.79059	9.56519	10.5163	9.57824	0.907419	-0.140159	0.00260762	0.0196982	down
ENSG00000189403	HMGB1	high mobility group box 1 [Source:HGNC Symbol;Acc:HGNC:4983]	protein_coding;processed_transcript	80.768	79.4112	77.2084	83.3982	89.0967	89.0563	0.907614	-0.139849	6.08859e-06	8.48262e-05	down
ENSG00000136938	ANP32B	acidic nuclear phosphoprotein 32 family member B [Source:HGNC Symbol;Acc:HGNC:16677]	protein_coding;processed_transcript	299.638	312.147	316.015	337.468	339.09	341.025	0.911769	-0.13326	1.97003e-08	3.95e-07	down
ENSG00000134001	EIF2S1	eukaryotic translation initiation factor 2 subunit alpha [Source:HGNC Symbol;Acc:HGNC:3265]	protein_coding;retained_intron	30.3213	32.4116	31.1827	33.2659	35.2916	33.9522	0.916163	-0.126324	0.000364885	0.00349917	down
ENSG00000062822	POLD1	DNA polymerase delta 1, catalytic subunit [Source:HGNC Symbol;Acc:HGNC:9175]	protein_coding;nonsense_mediated_decay;retained_intron	17.2064	19.1758	19.6172	20.1319	20.9283	20.0171	0.916863	-0.125223	0.00627582	0.0415603	down
ENSG00000133226	SRRM1	serine and arginine repetitive matrix 1 [Source:HGNC Symbol;Acc:HGNC:16638]	processed_transcript;protein_coding;retained_intron;nonsense_mediated_decay	20.2489	20.4782	20.72	23.0463	22.5789	21.3013	0.918128	-0.123233	0.000153545	0.00161797	down
ENSG00000132300	PTCD3	pentatricopeptide repeat domain 3 [Source:HGNC Symbol;Acc:HGNC:24717]	retained_intron;protein_coding;processed_transcript;nonsense_mediated_decay	13.6629	13.9178	14.2416	15.5316	14.7514	15.2427	0.918651	-0.122411	0.000291584	0.00286234	down
ENSG00000164032	H2AZ1	H2A.Z variant histone 1 [Source:HGNC Symbol;Acc:HGNC:4741]	retained_intron;protein_coding;processed_transcript	171.621	164.619	157.341	173.279	179.587	183.957	0.919446	-0.121163	0.000517423	0.00479509	down
ENSG00000100403	ZC3H7B	zinc finger CCCH-type containing 7B [Source:HGNC Symbol;Acc:HGNC:30869]	protein_coding;retained_intron	6.98818	7.25578	7.36157	7.89946	7.78098	7.80337	0.920018	-0.120266	0.00335223	0.024475	down
ENSG00000172534	HCFC1	host cell factor C1 [Source:HGNC Symbol;Acc:HGNC:4839]	protein_coding;processed_transcript	16.6183	16.7607	17.1715	19.1041	18.608	17.1998	0.920574	-0.119395	0.000848977	0.00744031	down
ENSG00000100836	PABPN1	poly(A) binding protein nuclear 1 [Source:HGNC Symbol;Acc:HGNC:8565]	protein_coding;retained_intron	39.1681	39.8644	41.233	44.2646	41.9721	44.1679	0.922249	-0.116771	0.000576051	0.00528493	down
ENSG00000101972	STAG2	stromal antigen 2 [Source:HGNC Symbol;Acc:HGNC:11355]	protein_coding;processed_transcript;nonsense_mediated_decay	27.4496	25.811	27.09	26.9124	30.6672	29.3362	0.924463	-0.113312	0.00444889	0.0312778	down
ENSG00000173757	STAT5B	signal transducer and activator of transcription 5B [Source:HGNC Symbol;Acc:HGNC:11367]	retained_intron;protein_coding	29.4387	29.1071	30.6139	32.6449	31.8413	31.8497	0.925508	-0.111682	0.000104029	0.00113898	down
ENSG00000065548	ZC3H15	zinc finger CCCH-type containing 15 [Source:HGNC Symbol;Acc:HGNC:29528]	nonsense_mediated_decay;protein_coding;processed_transcript;retained_intron	72.525	74.8655	71.2163	75.2928	81.4594	78.7961	0.928076	-0.107685	0.00182813	0.014523	down
ENSG00000093009	CDC45	cell division cycle 45 [Source:HGNC Symbol;Acc:HGNC:1739]	nonsense_mediated_decay;protein_coding;retained_intron	69.3538	72.9109	70.9402	79.5838	74.4705	74.9136	0.931156	-0.102905	0.00122444	0.0102574	down
ENSG00000103335	PIEZO1	piezo type mechanosensitive ion channel component 1 [Source:HGNC Symbol;Acc:HGNC:28993]	retained_intron;protein_coding;nonsense_mediated_decay	23.8936	24.1543	26.0305	27.0707	27.2224	25.0496	0.933651	-0.0990452	0.00170391	0.0136814	down
ENSG00000105063	PPP6R1	protein phosphatase 6 regulatory subunit 1 [Source:HGNC Symbol;Acc:HGNC:29195]	retained_intron;protein_coding	20.2378	21.0456	21.2227	22.357	22.6443	21.4087	0.941213	-0.0874064	0.00672745	0.0441102	down
ENSG00000169710	FASN	fatty acid synthase [Source:HGNC Symbol;Acc:HGNC:3594]	retained_intron;protein_coding;processed_transcript;nonsense_mediated_decay	34.2356	35.4665	38.5621	39.5744	38.2637	36.8555	0.943943	-0.0832286	0.00726665	0.0470511	down
ENSG00000115053	NCL	nucleolin [Source:HGNC Symbol;Acc:HGNC:7667]	retained_intron;protein_coding	175.816	180.494	184.056	190.382	191.546	188.787	0.946824	-0.0788325	1.36763e-05	0.000179457	down
ENSG00000114867	EIF4G1	eukaryotic translation initiation factor 4 gamma 1 [Source:HGNC Symbol;Acc:HGNC:3296]	protein_coding;nonsense_mediated_decay;retained_intron	67.6436	69.7592	68.8447	74.036	73.1559	68.4036	0.956641	-0.0639511	0.00608188	0.0405201	down
ENSG00000127616	SMARCA4	SWI/SNF related, matrix associated, actin dependent regulator of chromatin, subfamily a, member 4 [Source:HGNC Symbol;Acc:HGNC:11100]	protein_coding;nonsense_mediated_decay;retained_intron;processed_transcript	14.6165	14.6678	14.9802	13.8327	14.0063	13.3979	1.07342	0.102212	0.00738325	0.0476772	up
ENSG00000130816	DNMT1	DNA methyltransferase 1 [Source:HGNC Symbol;Acc:HGNC:2976]	retained_intron;protein_coding;nonsense_mediated_decay;processed_transcript	26.4038	26.2412	27.0818	25.2283	24.8045	23.7805	1.08011	0.111182	0.00292347	0.0217673	up
ENSG00000091140	DLD	dihydrolipoamide dehydrogenase [Source:HGNC Symbol;Acc:HGNC:2898]	protein_coding;retained_intron;nonsense_mediated_decay;processed_transcript	66.0092	65.689	66.3983	59.5437	62.6095	60.8476	1.08249	0.114353	0.00183151	0.0145364	up
ENSG00000168827	GFM1	G elongation factor mitochondrial 1 [Source:HGNC Symbol;Acc:HGNC:13780]	protein_coding;nonsense_mediated_decay;retained_intron;processed_transcript	15.3964	15.5983	15.6342	14.5154	14.5375	13.9531	1.08424	0.116682	0.00385109	0.0275731	up
ENSG00000071564	TCF3	transcription factor 3 [Source:HGNC Symbol;Acc:HGNC:11633]	protein_coding;nonsense_mediated_decay;retained_intron	24.6796	24.9864	25.8336	22.6768	23.5649	23.1567	1.08792	0.121568	0.00667057	0.0437874	up
ENSG00000118705	RPN2	ribophorin II [Source:HGNC Symbol;Acc:HGNC:10382]	protein_coding;nonsense_mediated_decay;processed_transcript	120.408	124.564	128.048	116.778	111.608	112.934	1.09288	0.128134	0.000445301	0.0041777	up
ENSG00000136108	CKAP2	cytoskeleton associated protein 2 [Source:HGNC Symbol;Acc:HGNC:1990]	protein_coding;retained_intron	28.9525	29.2325	28.1068	25.3227	26.7137	26.4694	1.09918	0.136425	0.00743195	0.0479173	up
ENSG00000103495	MAZ	MYC associated zinc finger protein [Source:HGNC Symbol;Acc:HGNC:6914]	protein_coding;retained_intron;nonsense_mediated_decay	75.5336	80.2512	85.0752	70.7958	72.74	74.7598	1.10337	0.141912	0.00254813	0.0192863	up
ENSG00000141027	NCOR1	nuclear receptor corepressor 1 [Source:HGNC Symbol;Acc:HGNC:7672]	retained_intron;protein_coding;processed_transcript;nonsense_mediated_decay	7.90674	7.74563	7.93814	7.33507	7.40571	6.59316	1.10577	0.145056	0.00702868	0.045729	up
ENSG00000168137	SETD5	SET domain containing 5 [Source:HGNC Symbol;Acc:HGNC:25566]	nonsense_mediated_decay;retained_intron;processed_transcript;protein_coding	15.4935	15.075	16.0638	14.5288	14.4944	13.0843	1.10746	0.147252	0.0019149	0.0150914	up
ENSG00000175216	CKAP5	cytoskeleton associated protein 5 [Source:HGNC Symbol;Acc:HGNC:28959]	protein_coding;retained_intron;processed_transcript	45.0915	46.1648	46.1039	41.1886	43.1382	39.586	1.10852	0.148639	5.05342e-05	0.00059111	up
ENSG00000204469	PRRC2A	proline rich coiled-coil 2A [Source:HGNC Symbol;Acc:HGNC:13918]	retained_intron;protein_coding;processed_transcript	46.9432	46.8797	49.7051	44.3238	42.9195	41.6795	1.11329	0.154824	4.51299e-06	6.43432e-05	up
ENSG00000095319	NUP188	nucleoporin 188 [Source:HGNC Symbol;Acc:HGNC:17859]	processed_transcript;protein_coding;retained_intron	37.2617	38.6055	38.6908	35.217	36.0297	31.3287	1.11682	0.159394	0.000662443	0.00598583	up
ENSG00000115355	CCDC88A	coiled-coil domain containing 88A [Source:HGNC Symbol;Acc:HGNC:25523]	nonsense_mediated_decay;protein_coding;retained_intron;processed_transcript	5.98996	5.55014	5.76867	5.07558	5.33355	5.02068	1.12177	0.165783	0.0002536	0.00252368	up
ENSG00000108510	MED13	mediator complex subunit 13 [Source:HGNC Symbol;Acc:HGNC:22474]	protein_coding;retained_intron;processed_transcript	9.4724	9.52214	9.03557	7.82972	9.08504	8.02227	1.12404	0.168688	0.0074099	0.0478097	up
ENSG00000106327	TFR2	transferrin receptor 2 [Source:HGNC Symbol;Acc:HGNC:11762]	protein_coding;retained_intron;nonsense_mediated_decay	17.9217	18.2017	19.2882	15.9323	16.3245	16.9853	1.12529	0.170297	0.00237724	0.0181873	up
ENSG00000188157	AGRN	agrin [Source:HGNC Symbol;Acc:HGNC:329]	protein_coding;retained_intron	10.8072	11.1105	12.1749	10.5756	9.77384	9.89944	1.12707	0.172574	0.00184288	0.0146014	up
ENSG00000149930	TAOK2	TAO kinase 2 [Source:HGNC Symbol;Acc:HGNC:16835]	protein_coding;retained_intron	6.49666	6.52765	6.68305	6.09796	5.83164	5.53879	1.12817	0.173987	0.00602575	0.040238	up
ENSG00000174780	SRP72	signal recognition particle 72 [Source:HGNC Symbol;Acc:HGNC:11303]	retained_intron;protein_coding	54.2885	56.6052	56.7979	48.9723	51.5377	47.9394	1.12962	0.175838	1.88231e-06	2.8577e-05	up
ENSG00000047410	TPR	translocated promoter region, nuclear basket protein [Source:HGNC Symbol;Acc:HGNC:12017]	processed_transcript;protein_coding;retained_intron	31.56	32.4799	33.0624	27.9372	29.7944	27.8754	1.13428	0.181776	4.07547e-07	6.86328e-06	up
ENSG00000139641	ESYT1	extended synaptotagmin 1 [Source:HGNC Symbol;Acc:HGNC:29534]	retained_intron;protein_coding;processed_transcript	53.1731	52.9027	54.168	50.1166	47.3283	43.7184	1.13517	0.182905	3.3636e-05	0.000410246	up
ENSG00000173209	AHSA2P	activator of HSP90 ATPase homolog 2, pseudogene [Source:HGNC Symbol;Acc:HGNC:20437]	retained_intron;processed_transcript;transcribed_unitary_pseudogene	7.89279	7.10119	7.67803	6.68804	6.89898	6.34327	1.13757	0.18595	0.00408425	0.0290421	up
ENSG00000146918	NCAPG2	non-SMC condensin II complex subunit G2 [Source:HGNC Symbol;Acc:HGNC:21904]	retained_intron;protein_coding;processed_transcript;nonsense_mediated_decay	36.3089	35.49	36.5404	32.2227	32.3074	30.7055	1.13759	0.185984	1.41128e-07	2.51176e-06	up
ENSG00000113522	RAD50	RAD50 double strand break repair protein [Source:HGNC Symbol;Acc:HGNC:9816]	nonsense_mediated_decay;protein_coding;processed_transcript;retained_intron	15.3848	15.5944	15.8233	13.6981	14.183	13.1535	1.14056	0.189745	6.64025e-06	9.16914e-05	up
ENSG00000013306	SLC25A39	solute carrier family 25 member 39 [Source:HGNC Symbol;Acc:HGNC:24279]	retained_intron;protein_coding;nonsense_mediated_decay	32.2531	32.797	34.6271	29.9828	28.4061	28.7046	1.14448	0.194698	5.56708e-05	0.000646338	up
ENSG00000186635	ARAP1	ArfGAP with RhoGAP domain, ankyrin repeat and PH domain 1 [Source:HGNC Symbol;Acc:HGNC:16925]	protein_coding;retained_intron;processed_transcript	5.50651	5.80806	5.89764	4.97893	4.91422	5.13113	1.14563	0.196136	0.00323617	0.0237548	up
ENSG00000054267	ARID4B	AT-rich interaction domain 4B [Source:HGNC Symbol;Acc:HGNC:15550]	protein_coding;retained_intron;nonsense_mediated_decay;processed_transcript	4.51684	4.1609	4.36447	3.80975	3.94136	3.62827	1.14613	0.196765	0.00527393	0.0361558	up
ENSG00000167004	PDIA3	protein disulfide isomerase family A member 3 [Source:HGNC Symbol;Acc:HGNC:4606]	protein_coding;retained_intron;nonsense_mediated_decay;processed_transcript	110.611	116.736	116.187	97.4368	100.468	101.806	1.14622	0.196883	2.50314e-08	4.9456e-07	up
ENSG00000070814	TCOF1	treacle ribosome biogenesis factor 1 [Source:HGNC Symbol;Acc:HGNC:11654]	protein_coding;nonsense_mediated_decay;retained_intron;processed_transcript	18.2475	18.8238	19.2581	16.788	16.5277	15.779	1.14736	0.19832	2.36457e-07	4.10184e-06	up
ENSG00000157741	UBN2	ubinuclein 2 [Source:HGNC Symbol;Acc:HGNC:21931]	protein_coding;retained_intron	4.96532	4.89901	5.38017	4.52922	4.54877	4.14564	1.15282	0.205171	0.000475095	0.0044345	up
ENSG00000171988	JMJD1C	jumonji domain containing 1C [Source:HGNC Symbol;Acc:HGNC:12313]	retained_intron;processed_transcript;protein_coding	8.5377	8.22532	8.25106	7.17932	7.63124	6.86756	1.15389	0.2065	0.00022381	0.00226192	up
ENSG00000108055	SMC3	structural maintenance of chromosomes 3 [Source:HGNC Symbol;Acc:HGNC:2468]	processed_transcript;protein_coding	30.0925	31.5804	29.9615	24.9286	27.8578	26.5743	1.15466	0.207463	5.5915e-05	0.00064893	up
ENSG00000177156	TALDO1	transaldolase 1 [Source:HGNC Symbol;Acc:HGNC:11559]	protein_coding;retained_intron;nonsense_mediated_decay;processed_transcript	89.587	91.2059	90.4489	78.9363	77.0394	78.3616	1.15748	0.210993	1.2024e-09	2.80453e-08	up
ENSG00000197136	PCNX3	pecanex 3 [Source:HGNC Symbol;Acc:HGNC:18760]	retained_intron;protein_coding;processed_transcript	8.64638	8.19279	9.35384	7.49391	7.69146	7.41692	1.15887	0.212713	0.000707897	0.00633405	up
ENSG00000076944	STXBP2	syntaxin binding protein 2 [Source:HGNC Symbol;Acc:HGNC:11445]	retained_intron;protein_coding;nonsense_mediated_decay	9.77114	10.5193	11.5693	9.28854	9.09561	8.98152	1.16422	0.219368	0.00140855	0.0115908	up
ENSG00000100350	FOXRED2	FAD dependent oxidoreductase domain containing 2 [Source:HGNC Symbol;Acc:HGNC:26264]	protein_coding;retained_intron	8.42304	8.47165	7.30317	6.95423	6.94649	6.85874	1.16563	0.221111	0.00671479	0.0440365	up
ENSG00000129925	PGAP6	post-glycosylphosphatidylinositol attachment to proteins 6 [Source:HGNC Symbol;Acc:HGNC:17205]	protein_coding;retained_intron;processed_transcript	8.87585	8.83388	8.368	7.49292	7.40241	7.46497	1.16625	0.221879	0.00303434	0.0224639	up
ENSG00000099821	POLRMT	RNA polymerase mitochondrial [Source:HGNC Symbol;Acc:HGNC:9200]	protein_coding;nonsense_mediated_decay;retained_intron	14.2798	15.0991	14.6404	12.681	12.8587	12.1873	1.16678	0.222535	7.30081e-05	0.000829378	up
ENSG00000082212	ME2	malic enzyme 2 [Source:HGNC Symbol;Acc:HGNC:6984]	protein_coding;retained_intron;nonsense_mediated_decay	4.24624	4.25317	4.22339	3.3854	3.76911	3.73623	1.16822	0.224315	0.000566726	0.00520552	up
ENSG00000272333	KMT2B	lysine methyltransferase 2B [Source:HGNC Symbol;Acc:HGNC:15840]	protein_coding;nonsense_mediated_decay;retained_intron;processed_transcript	5.8301	6.32744	7.09324	5.50777	5.64795	5.29601	1.17014	0.226678	0.0017274	0.0138379	up
ENSG00000102241	HTATSF1	HIV-1 Tat specific factor 1 [Source:HGNC Symbol;Acc:HGNC:5276]	protein_coding	56.3941	56.135	57.2882	46.3178	49.8724	48.7321	1.17178	0.228705	1.6604e-07	2.92927e-06	up
ENSG00000140521	POLG	DNA polymerase gamma, catalytic subunit [Source:HGNC Symbol;Acc:HGNC:9179]	protein_coding;nonsense_mediated_decay;retained_intron;processed_transcript	8.21683	8.01586	8.89931	7.33956	7.06152	7.0072	1.17394	0.231356	0.000159031	0.00167012	up
ENSG00000110917	MLEC	malectin [Source:HGNC Symbol;Acc:HGNC:28973]	protein_coding;processed_transcript	35.5498	35.8238	35.9992	32.0062	30.7305	28.5441	1.17629	0.234243	2.48134e-08	4.9119e-07	up
ENSG00000198900	TOP1	DNA topoisomerase I [Source:HGNC Symbol;Acc:HGNC:11986]	protein_coding	110.854	111.989	115.035	91.9081	100.019	94.7211	1.17872	0.237223	8.68312e-11	2.30302e-09	up
ENSG00000079432	CIC	capicua transcriptional repressor [Source:HGNC Symbol;Acc:HGNC:14214]	protein_coding;retained_intron;nonsense_mediated_decay;processed_transcript	6.29848	5.82802	6.07303	5.28336	4.98205	5.15958	1.17987	0.238631	0.000219248	0.00222087	up
ENSG00000134265	NAPG	NSF attachment protein gamma [Source:HGNC Symbol;Acc:HGNC:7642]	retained_intron;protein_coding;nonsense_mediated_decay	12.8268	12.7919	12.863	10.7563	10.6103	11.2173	1.181	0.240012	2.79742e-05	0.000346072	up
ENSG00000138592	USP8	ubiquitin specific peptidase 8 [Source:HGNC Symbol;Acc:HGNC:12631]	protein_coding;nonsense_mediated_decay;non_stop_decay;retained_intron;processed_transcript	3.84761	4.20655	3.97183	3.30178	3.67157	3.20654	1.18135	0.240434	0.000215958	0.00219182	up
ENSG00000166965	RCCD1	RCC1 domain containing 1 [Source:HGNC Symbol;Acc:HGNC:30457]	protein_coding;retained_intron;nonsense_mediated_decay;processed_transcript	5.73939	5.64598	6.00221	5.2607	4.63965	4.80637	1.18229	0.241582	0.0056158	0.0380157	up
ENSG00000175727	MLXIP	MLX interacting protein [Source:HGNC Symbol;Acc:HGNC:17055]	protein_coding;retained_intron;processed_transcript	6.23101	6.04601	6.78475	5.55286	5.29172	5.25662	1.18387	0.243513	1.7655e-05	0.000226604	up
ENSG00000157212	PAXIP1	PAX interacting protein 1 [Source:HGNC Symbol;Acc:HGNC:8624]	processed_transcript;nonsense_mediated_decay;retained_intron;protein_coding	8.20594	8.75566	8.71658	7.71488	6.88621	7.02903	1.18715	0.247501	3.73376e-05	0.000450776	up
ENSG00000099949	LZTR1	leucine zipper like transcription regulator 1 [Source:HGNC Symbol;Acc:HGNC:6742]	nonsense_mediated_decay;retained_intron;processed_transcript;protein_coding	10.0342	10.2688	10.8082	8.55724	8.95221	8.63407	1.19001	0.250977	1.50113e-06	2.31054e-05	up
ENSG00000145725	PPIP5K2	diphosphoinositol pentakisphosphate kinase 2 [Source:HGNC Symbol;Acc:HGNC:29035]	protein_coding;retained_intron;processed_transcript;nonsense_mediated_decay	11.4805	11.5009	10.8961	9.24412	10.1167	9.05049	1.19239	0.253861	2.76308e-07	4.74554e-06	up
ENSG00000103249	CLCN7	chloride voltage-gated channel 7 [Source:HGNC Symbol;Acc:HGNC:2025]	protein_coding;retained_intron;processed_transcript	6.4983	6.79275	7.93838	5.81385	6.06647	5.90138	1.19389	0.255673	0.00110184	0.00934853	up
ENSG00000164961	WASHC5	WASH complex subunit 5 [Source:HGNC Symbol;Acc:HGNC:28984]	processed_transcript;protein_coding;retained_intron	11.952	12.8883	11.5481	10.2386	9.97869	10.0905	1.20063	0.263787	9.79414e-05	0.00107954	up
ENSG00000197457	STMN3	stathmin 3 [Source:HGNC Symbol;Acc:HGNC:15926]	protein_coding	20.8275	21.6883	22.3121	17.6536	17.3522	18.9476	1.20155	0.2649	3.52281e-05	0.000427655	up
ENSG00000141569	TRIM65	tripartite motif containing 65 [Source:HGNC Symbol;Acc:HGNC:27316]	protein_coding;processed_transcript;retained_intron	13.7286	12.8035	14.2479	11.8463	11.144	10.9444	1.20172	0.265103	8.98637e-05	0.00100042	up
ENSG00000119812	FAM98A	family with sequence similarity 98 member A [Source:HGNC Symbol;Acc:HGNC:24520]	retained_intron;protein_coding;processed_transcript	26.342	25.5946	26.3044	21.669	21.9872	21.4497	1.20175	0.265137	5.58954e-10	1.35551e-08	up
ENSG00000100401	RANGAP1	Ran GTPase activating protein 1 [Source:HGNC Symbol;Acc:HGNC:9854]	protein_coding	20.1853	19.9915	21.9341	17.0559	17.4889	17.0676	1.20341	0.267128	2.034e-08	4.06773e-07	up
ENSG00000198604	BAZ1A	bromodomain adjacent to zinc finger domain 1A [Source:HGNC Symbol;Acc:HGNC:960]	protein_coding;retained_intron;processed_transcript;nonsense_mediated_decay	17.6446	18.3222	18.384	14.6918	15.4494	14.8956	1.20681	0.271196	6.55097e-10	1.57638e-08	up
ENSG00000075240	GRAMD4	GRAM domain containing 4 [Source:HGNC Symbol;Acc:HGNC:29113]	protein_coding;processed_transcript	7.09775	6.69363	7.38138	5.77717	5.64777	6.02019	1.21368	0.279386	0.000491566	0.00457317	up
ENSG00000167280	ENGASE	endo-beta-N-acetylglucosaminidase [Source:HGNC Symbol;Acc:HGNC:24622]	retained_intron;processed_transcript;nonsense_mediated_decay;protein_coding	3.36408	3.4517	3.98739	2.99141	2.82097	3.0882	1.21376	0.279484	0.00669442	0.0439122	up
ENSG00000169371	SNUPN	snurportin 1 [Source:HGNC Symbol;Acc:HGNC:14245]	protein_coding;retained_intron	8.93544	10.1303	9.1976	8.57693	6.76574	7.86931	1.21762	0.284064	0.0048919	0.0339857	up
ENSG00000032219	ARID4A	AT-rich interaction domain 4A [Source:HGNC Symbol;Acc:HGNC:9885]	protein_coding;processed_transcript;nonsense_mediated_decay;retained_intron	3.62697	3.29642	3.2791	2.70112	3.08401	2.5924	1.21784	0.284325	0.00498508	0.0345175	up
ENSG00000051523	CYBA	cytochrome b-245 alpha chain [Source:HGNC Symbol;Acc:HGNC:2577]	protein_coding;processed_transcript;retained_intron	34.465	34.2521	35.8612	28.5472	27.4176	29.7258	1.22042	0.287377	1.73161e-08	3.49896e-07	up
ENSG00000178209	PLEC	plectin [Source:HGNC Symbol;Acc:HGNC:9069]	protein_coding;retained_intron	9.50809	9.74464	10.4888	8.45934	8.31533	7.58	1.22118	0.288279	3.81086e-09	8.37327e-08	up
ENSG00000119203	CPSF3	cleavage and polyadenylation specific factor 3 [Source:HGNC Symbol;Acc:HGNC:2326]	protein_coding;retained_intron;processed_transcript	39.6368	42.6733	42.534	33.3411	33.9789	34.3996	1.22734	0.295532	7.25279e-11	1.94018e-09	up
ENSG00000157637	SLC38A10	solute carrier family 38 member 10 [Source:HGNC Symbol;Acc:HGNC:28237]	protein_coding;retained_intron;processed_transcript	6.08137	6.38353	6.71595	4.74584	5.47186	5.38358	1.22944	0.298003	0.000115415	0.00124784	up
ENSG00000196365	LONP1	lon peptidase 1, mitochondrial [Source:HGNC Symbol;Acc:HGNC:9479]	protein_coding;retained_intron;processed_transcript;nonsense_mediated_decay	35.5352	34.8081	35.8099	28.2989	29.4226	28.3928	1.2327	0.301825	6.59721e-15	2.54237e-13	up
ENSG00000127603	MACF1	microtubule actin crosslinking factor 1 [Source:HGNC Symbol;Acc:HGNC:13664]	protein_coding;processed_transcript;retained_intron;nonsense_mediated_decay	7.1525	7.45513	7.78005	6.4391	6.32002	5.40091	1.2328	0.301939	5.2239e-09	1.12725e-07	up
ENSG00000014216	CAPN1	calpain 1 [Source:HGNC Symbol;Acc:HGNC:1476]	protein_coding;retained_intron;processed_transcript;nonsense_mediated_decay	22.5324	21.2685	21.698	17.7771	17.5991	17.7468	1.23297	0.302135	8.88762e-13	2.87078e-11	up
ENSG00000126464	PRR12	proline rich 12 [Source:HGNC Symbol;Acc:HGNC:29217]	protein_coding;retained_intron	3.72022	4.11303	4.31147	3.57067	3.20744	3.06503	1.23383	0.303139	0.00100517	0.0086271	up
ENSG00000182095	TNRC18	trinucleotide repeat containing 18 [Source:HGNC Symbol;Acc:HGNC:11962]	protein_coding;retained_intron	5.77794	6.18299	6.33462	5.00758	5.08199	4.6522	1.24107	0.311583	1.02861e-07	1.87084e-06	up
ENSG00000044090	CUL7	cullin 7 [Source:HGNC Symbol;Acc:HGNC:21024]	retained_intron;processed_transcript;protein_coding;nonsense_mediated_decay	5.55351	5.27266	6.01278	5.10526	4.52695	3.88035	1.24617	0.317501	0.00140358	0.0115529	up
ENSG00000179588	ZFPM1	zinc finger protein, FOG family member 1 [Source:HGNC Symbol;Acc:HGNC:19762]	protein_coding;retained_intron	3.43111	4.01182	4.27923	3.07206	3.09809	3.23526	1.24632	0.317676	0.00233748	0.0179184	up
ENSG00000198026	ZNF335	zinc finger protein 335 [Source:HGNC Symbol;Acc:HGNC:15807]	protein_coding;processed_transcript	2.75405	2.93334	3.13613	2.46712	2.34852	2.24805	1.24914	0.320932	0.000969197	0.00835285	up
ENSG00000130402	ACTN4	actinin alpha 4 [Source:HGNC Symbol;Acc:HGNC:166]	protein_coding;retained_intron;processed_transcript	70.56	71.0303	72.1738	57.3901	57.5737	55.2044	1.25619	0.329059	5.81177e-31	5.60269e-29	up
ENSG00000142102	PGGHG	protein-glucosylgalactosylhydroxylysine glucosidase [Source:HGNC Symbol;Acc:HGNC:26210]	retained_intron;protein_coding;nonsense_mediated_decay	5.95032	5.20166	6.74096	4.62844	4.77752	4.75385	1.26364	0.337587	0.000596702	0.00546153	up
ENSG00000196923	PDLIM7	PDZ and LIM domain 7 [Source:HGNC Symbol;Acc:HGNC:22958]	retained_intron;processed_transcript;protein_coding;nonsense_mediated_decay	12.3987	13.4943	14.1656	10.2934	10.4151	10.8951	1.26754	0.342026	4.97157e-07	8.21682e-06	up
ENSG00000047648	ARHGAP6	Rho GTPase activating protein 6 [Source:HGNC Symbol;Acc:HGNC:676]	processed_transcript;retained_intron;protein_coding;nonsense_mediated_decay	9.2821	9.30301	9.50895	7.13072	7.57431	7.45053	1.26804	0.342596	1.08063e-10	2.83554e-09	up
ENSG00000034053	APBA2	amyloid beta precursor protein binding family A member 2 [Source:HGNC Symbol;Acc:HGNC:579]	protein_coding;retained_intron	8.06526	7.25241	7.90434	6.03547	6.04294	6.21223	1.26961	0.344387	4.08275e-07	6.86936e-06	up
ENSG00000161714	PLCD3	phospholipase C delta 3 [Source:HGNC Symbol;Acc:HGNC:9061]	protein_coding;processed_transcript;retained_intron	2.39406	2.28207	2.2494	1.67827	1.80163	1.9692	1.27095	0.345905	0.00365776	0.026383	up
ENSG00000070444	MNT	MAX network transcriptional repressor [Source:HGNC Symbol;Acc:HGNC:7188]	retained_intron;protein_coding;processed_transcript	1.8772	2.17275	2.07345	1.34685	1.76044	1.69361	1.27547	0.351027	0.00684523	0.0447318	up
ENSG00000141959	PFKL	phosphofructokinase, liver type [Source:HGNC Symbol;Acc:HGNC:8876]	protein_coding;retained_intron;nonsense_mediated_decay;processed_transcript	11.5141	11.1521	11.805	8.68547	9.29771	9.04208	1.27551	0.351078	3.87577e-12	1.17397e-10	up
ENSG00000138867	GUCD1	guanylyl cyclase domain containing 1 [Source:HGNC Symbol;Acc:HGNC:14237]	protein_coding;retained_intron;processed_transcript	9.34471	10.1083	10.7189	8.17173	7.82836	7.64567	1.27599	0.351621	1.41614e-06	2.19273e-05	up
ENSG00000198198	SZT2	SZT2 subunit of KICSTOR complex [Source:HGNC Symbol;Acc:HGNC:29040]	processed_transcript;retained_intron;protein_coding;nonsense_mediated_decay	1.56353	1.49361	1.7569	1.21252	1.33999	1.21708	1.27707	0.352837	1.52366e-05	0.000198094	up
ENSG00000169220	RGS14	regulator of G protein signaling 14 [Source:HGNC Symbol;Acc:HGNC:9996]	protein_coding;processed_transcript;retained_intron	8.27848	8.24546	8.78221	6.37246	6.57372	6.84257	1.27881	0.354808	1.44232e-05	0.000188227	up
ENSG00000178814	OPLAH	5-oxoprolinase, ATP-hydrolysing [Source:HGNC Symbol;Acc:HGNC:8149]	protein_coding;retained_intron	8.67346	8.52542	9.62701	7.66629	6.57468	6.72834	1.27929	0.355347	2.19075e-05	0.000276177	up
ENSG00000196155	PLEKHG4	pleckstrin homology and RhoGEF domain containing G4 [Source:HGNC Symbol;Acc:HGNC:24501]	protein_coding;nonsense_mediated_decay;retained_intron	4.49885	4.78915	4.98426	3.86557	3.78352	3.47336	1.28319	0.359738	7.71357e-06	0.000105483	up
ENSG00000137411	VARS2	valyl-tRNA synthetase 2, mitochondrial [Source:HGNC Symbol;Acc:HGNC:21642]	protein_coding;processed_transcript;retained_intron	4.96693	4.81348	4.45962	4.68568	3.43706	2.96314	1.28452	0.361229	0.00550938	0.037473	up
ENSG00000055118	KCNH2	potassium voltage-gated channel subfamily H member 2 [Source:HGNC Symbol;Acc:HGNC:6251]	retained_intron;protein_coding	84.7728	86.3324	88.3186	65.9149	67.5823	67.8778	1.28826	0.365427	3.7939e-34	4.20407e-32	up
ENSG00000076201	PTPN23	protein tyrosine phosphatase non-receptor type 23 [Source:HGNC Symbol;Acc:HGNC:14406]	protein_coding;retained_intron;nonsense_mediated_decay	6.47246	6.35581	6.91869	5.27989	4.96527	5.07734	1.28876	0.365979	5.91313e-07	9.65511e-06	up
ENSG00000139880	CDH24	cadherin 24 [Source:HGNC Symbol;Acc:HGNC:14265]	protein_coding;processed_transcript	6.77417	7.19165	7.07076	5.07308	5.4815	5.76062	1.28939	0.366683	8.11894e-05	0.000912004	up
ENSG00000129083	COPB1	COPI coat complex subunit beta 1 [Source:HGNC Symbol;Acc:HGNC:2231]	processed_transcript;protein_coding	39.0138	41.1805	40.3259	29.5225	32.4193	30.7757	1.29987	0.378362	2.16754e-17	9.99896e-16	up
ENSG00000185340	GAS2L1	growth arrest specific 2 like 1 [Source:HGNC Symbol;Acc:HGNC:16955]	retained_intron;protein_coding	3.44814	2.66052	3.29516	2.58982	2.23265	2.31011	1.31843	0.398822	0.00368225	0.0265473	up
ENSG00000109881	CCDC34	coiled-coil domain containing 34 [Source:HGNC Symbol;Acc:HGNC:25079]	protein_coding;processed_transcript	8.77954	8.9115	8.14815	6.43304	6.71511	6.25823	1.33148	0.41303	4.27957e-06	6.12395e-05	up
ENSG00000173898	SPTBN2	spectrin beta, non-erythrocytic 2 [Source:HGNC Symbol;Acc:HGNC:11276]	protein_coding;processed_transcript;retained_intron	5.47319	5.56229	5.54492	4.16173	3.88208	3.79098	1.40099	0.486445	2.70198e-17	1.23909e-15	up
ENSG00000154479	CCDC173	coiled-coil domain containing 173 [Source:HGNC Symbol;Acc:HGNC:25064]	protein_coding	5.76066	5.41512	5.30136	3.48173	3.89379	4.00441	1.44791	0.533974	5.29291e-05	0.000616339	up
ENSG00000198771	RCSD1	RCSD domain containing 1 [Source:HGNC Symbol;Acc:HGNC:28310]	protein_coding;processed_transcript	16.1643	15.093	16.0402	11.1844	10.8828	10.21	1.46536	0.551251	8.68594e-30	7.93146e-28	up
ENSG00000187796	CARD9	caspase recruitment domain family member 9 [Source:HGNC Symbol;Acc:HGNC:16391]	retained_intron;nonsense_mediated_decay;protein_coding	6.13395	6.20176	7.26229	4.51243	3.91565	4.82566	1.47868	0.564307	1.66106e-09	3.7975e-08	up
ENSG00000110719	TCIRG1	T cell immune regulator 1, ATPase H+ transporting V0 subunit a3 [Source:HGNC Symbol;Acc:HGNC:11647]	protein_coding;retained_intron;nonsense_mediated_decay	8.62606	8.51237	9.27494	6.27713	5.31829	5.93923	1.50635	0.59106	1.63452e-12	5.18285e-11	up
ENSG00000178440	TIMM23B-AGAP6	TIMM23B-AGAP6 readthrough (NMD candidate) [Source:HGNC Symbol;Acc:HGNC:45009]	nonsense_mediated_decay;processed_transcript	3.34673	3.97336	4.23704	1.6458	2.84167	3.13894	1.51541	0.599706	0.00141374	0.0116273	up
ENSG00000074855	ANO8	anoctamin 8 [Source:HGNC Symbol;Acc:HGNC:29329]	nonsense_mediated_decay;retained_intron;protein_coding	2.23075	2.07878	2.1262	1.55178	1.39425	1.28188	1.5222	0.606162	1.37933e-05	0.000180765	up
ENSG00000114554	PLXNA1	plexin A1 [Source:HGNC Symbol;Acc:HGNC:9099]	protein_coding;retained_intron;processed_transcript	14.8797	15.0938	15.2456	9.70777	9.47008	8.37386	1.64124	0.71479	2.49337e-46	4.20637e-44	up
ENSG00000149115	TNKS1BP1	tankyrase 1 binding protein 1 [Source:HGNC Symbol;Acc:HGNC:19081]	retained_intron;protein_coding	10.2101	10.3776	11.7674	6.61233	6.89209	6.04609	1.65495	0.726791	4.20789e-27	3.3171e-25	up
