# Supplementary material for: Loss-of-function mutation in DDX53 associated with hereditary spastic paraplegia-like disorder
Source: Research Square preprint supplement (doi:10.21203/rs.3.rs-3529208/v1), 2023-11-14
Supplement: Supplementary file 2 [file 653a39ccf7dd64cde3a2455c.docx]

**Key Messages**

1. DDX53 deficiency was first reported to be associated with HSP disorder

2. DDX53 exhibited minimal impact on mitochondrial function

3. DDX53 impaired RNA metabolism in the nervous system
